# Supplementary material for: Investigations into within- and between-subject resting-state amplitude variations
Source: PubMed Central journal article supplement (PMC5678294; doi:10.1016/j.neuroimage.2017.07.014), 2017-10-01
Supplement: mmc2.pdf [file mmc2.pdf]

**Figure S1: Cross-subject clustering result for high dimensional ICA (d=200)**

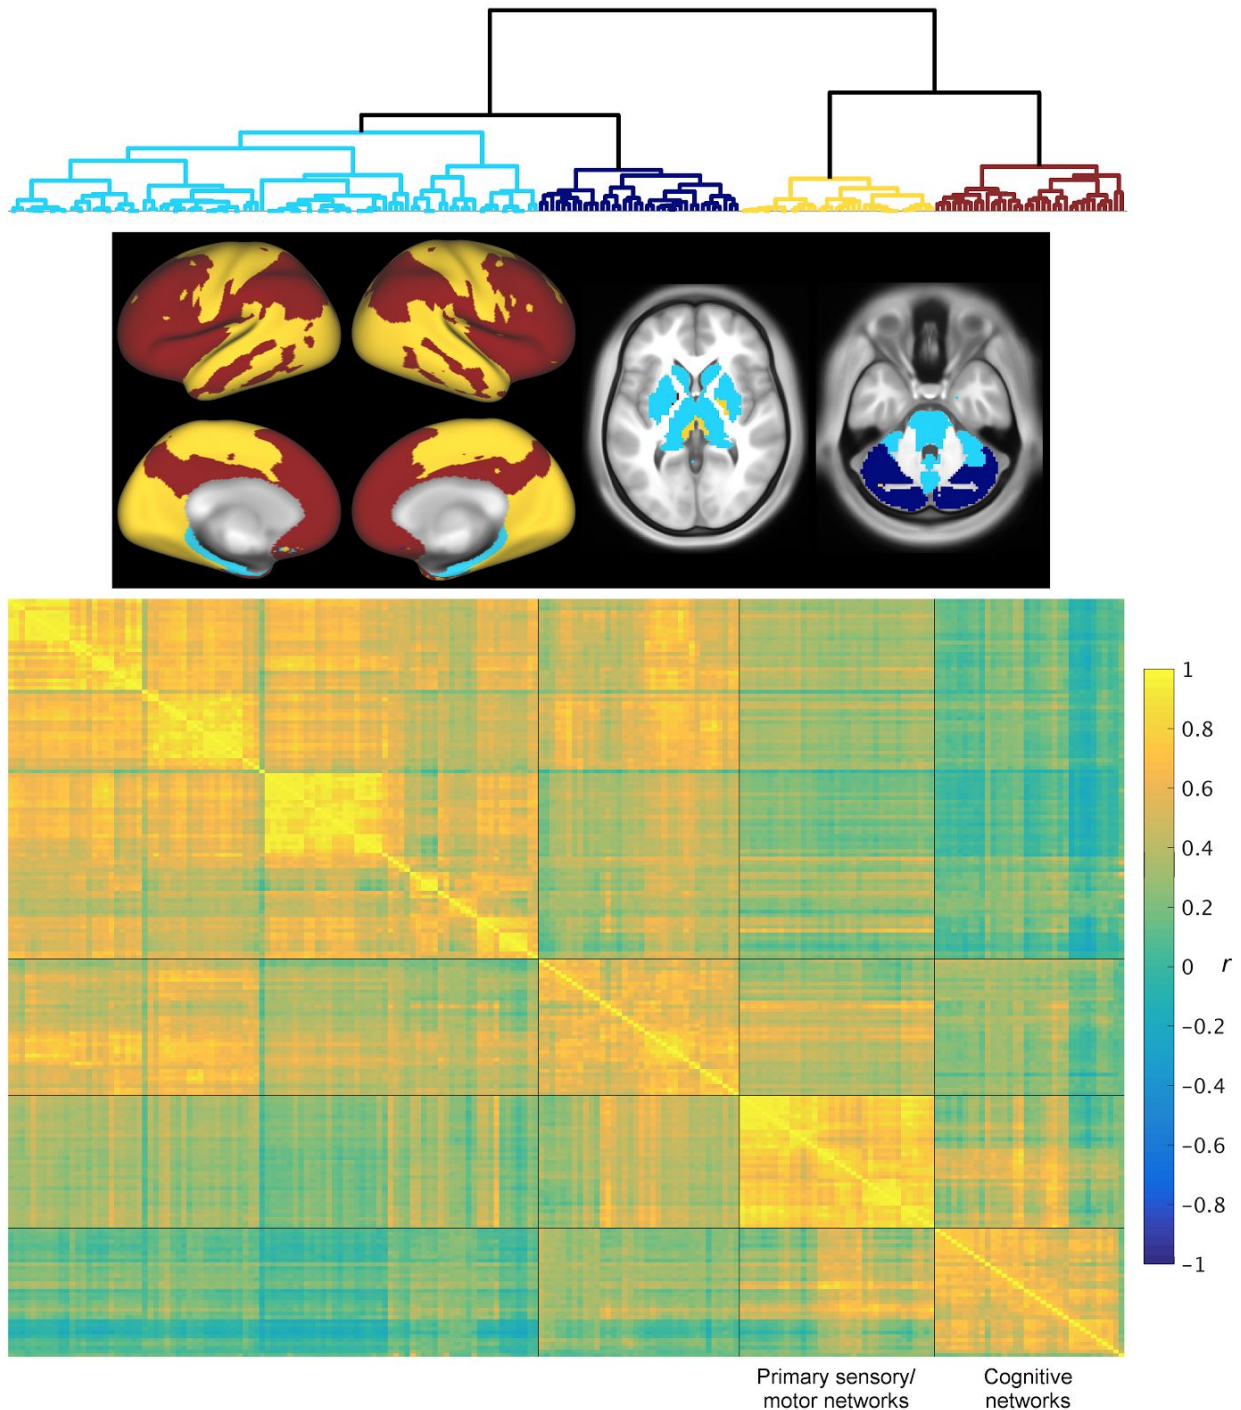

*Figure S1: Between subject clustering of network amplitude correlation matrix was repeated for 200-dimensionality group-ICA networks. The clustering results at this higher dimensionality replicated the 25-dimensionality results presented in figure 1, as cortical components were split into primary sensory/motor versus cognitive networks (in addition to a further split between cortical and subcortical components).*

**Figure S2: Correlations between two CCA modes and behavioural measures**

### Correlations between CCA modes of population covariation and behaviour

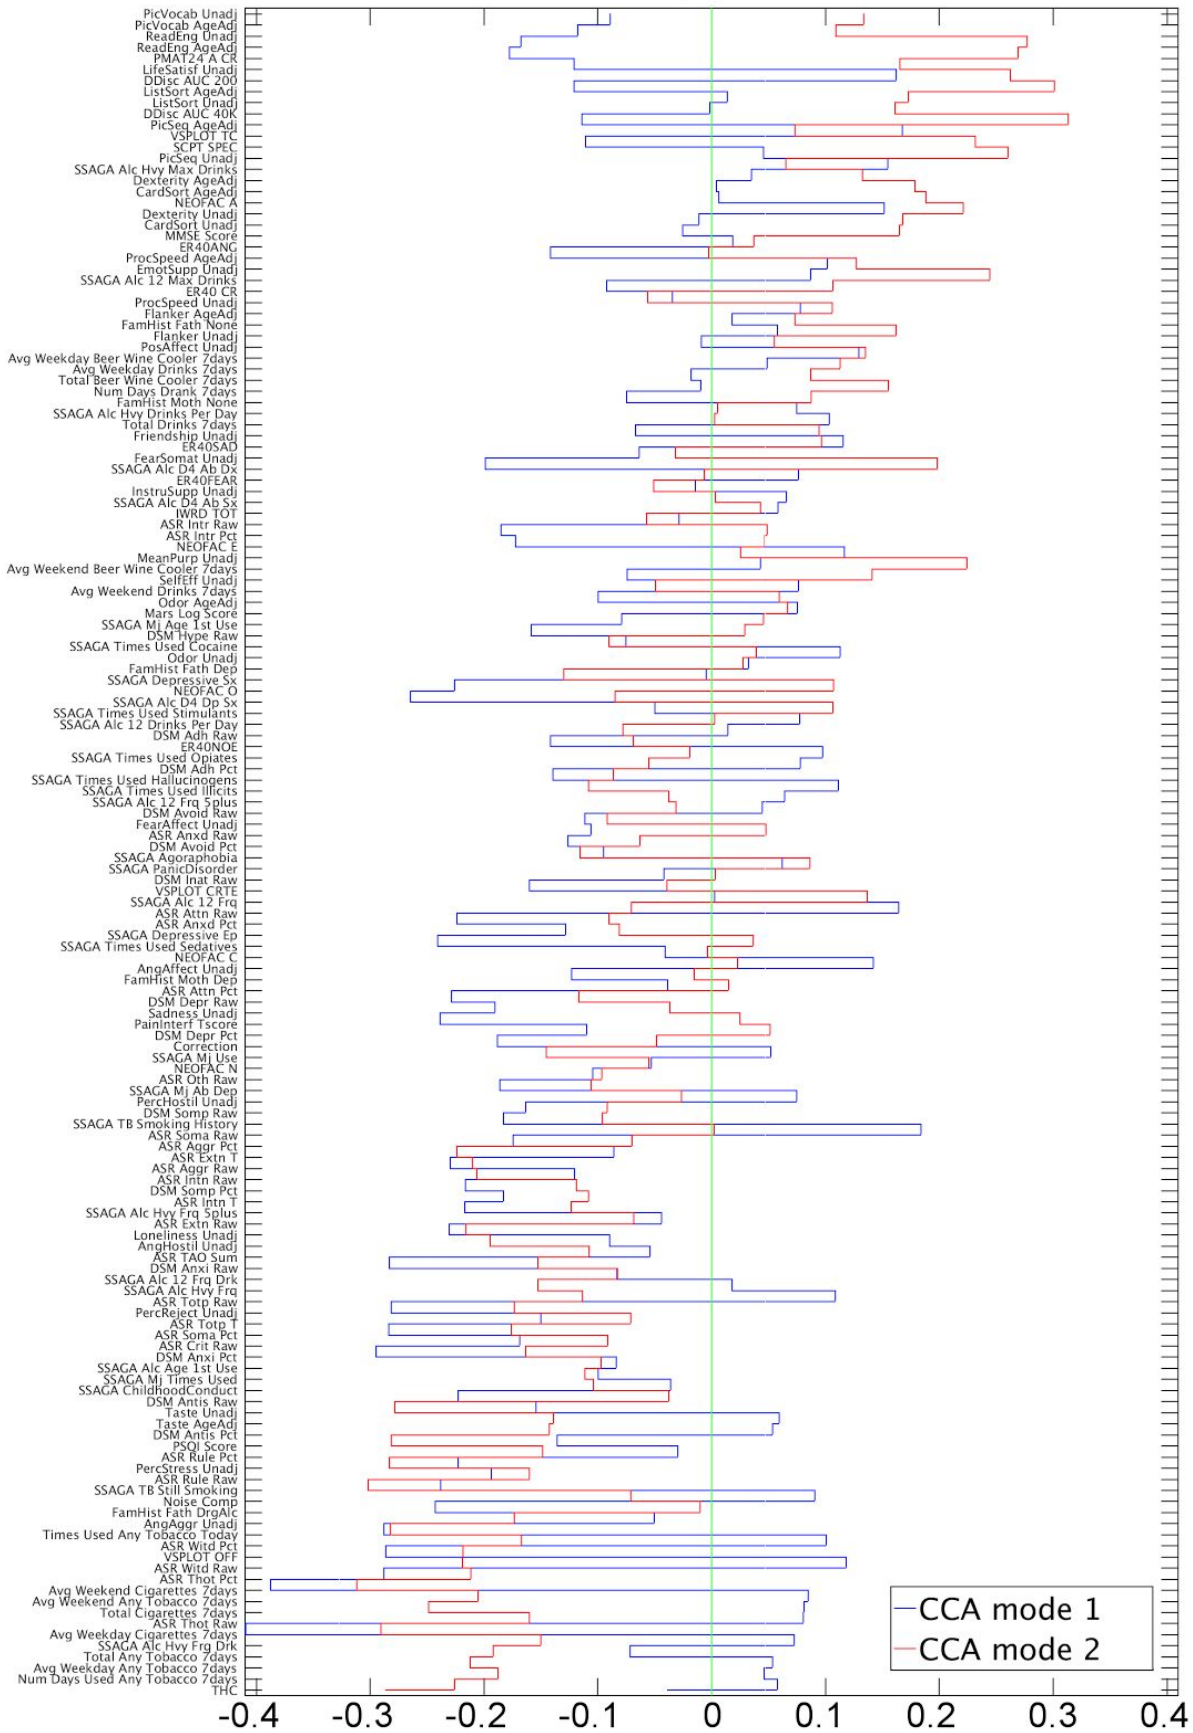

Figure S2: The first two significant CCA modes of population covariation were correlated back into each of the behavioural measures (on the y-axis, ordered based on their correlation with the original positive-negative mode of covariation in Smith et al., 2015).

**Figure S3: Within-run changes using fALFF as a measure of amplitude**

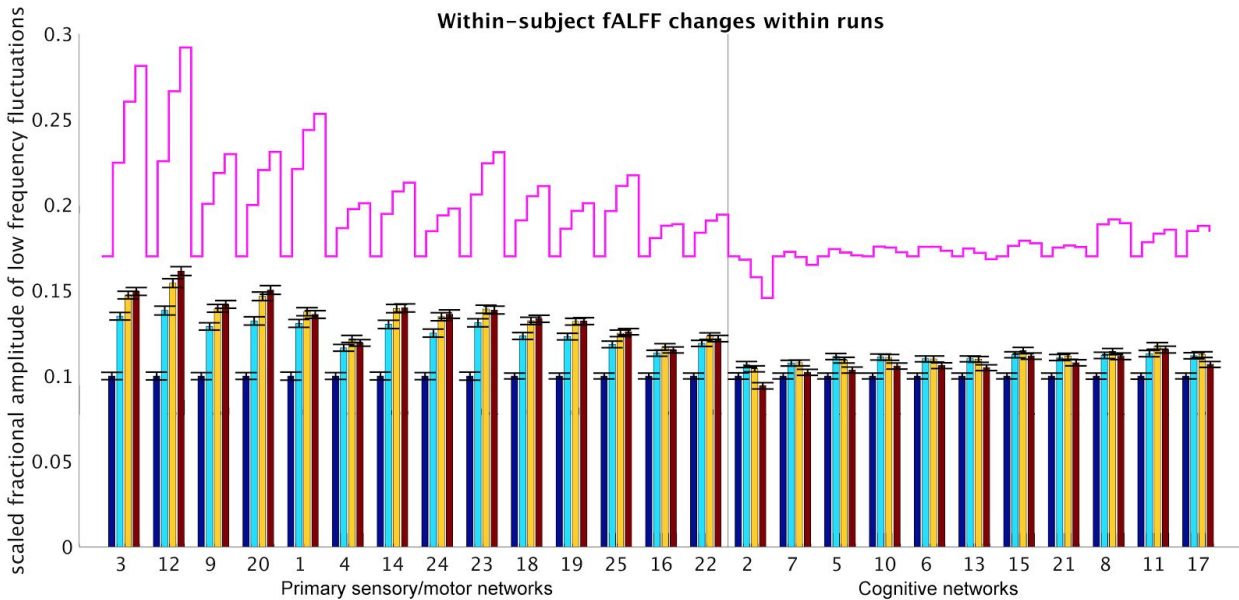

Figure S3: This figure shows the same results as figure 4B but using fALFF as a measure of amplitude instead of the timeseries standard deviation. To allow easy comparison of within-run changes, fALFF results were scaled within each network by removing the amplitude in the first  $\frac{1}{4}$  from all 4 bars and adding 0.1. Lines in magenta show the scaled means from figure 4B using amplitudes to facilitate comparison. The results show that the same characteristic within-run increases in primary sensory/motor networks can be observed using fALFF.

**Figure S4: Statistical comparison of between-run and within-run changes in amplitude**

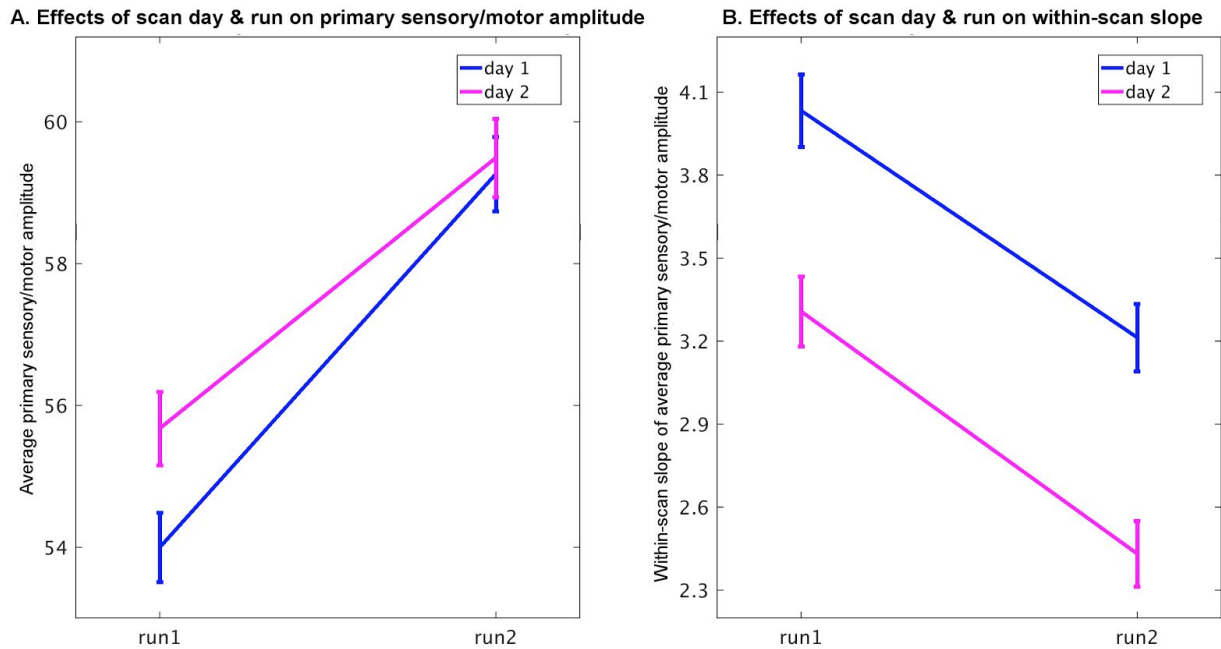

*Figure S4: Statistical comparison of the effects of day and run on both between-run changes (A) and within-run changes (B) in amplitude. The findings show that primary sensory/motor amplitudes were significantly lower at the start of day one, compared with the start of day 2. Within each run, there was an increase in primary sensory/motor amplitudes from the start to the end of the run, but the slope of this increase was steeper during run 1 compared with run 2 on the same day.*

**Figure S5: Frequency components of within run changes**

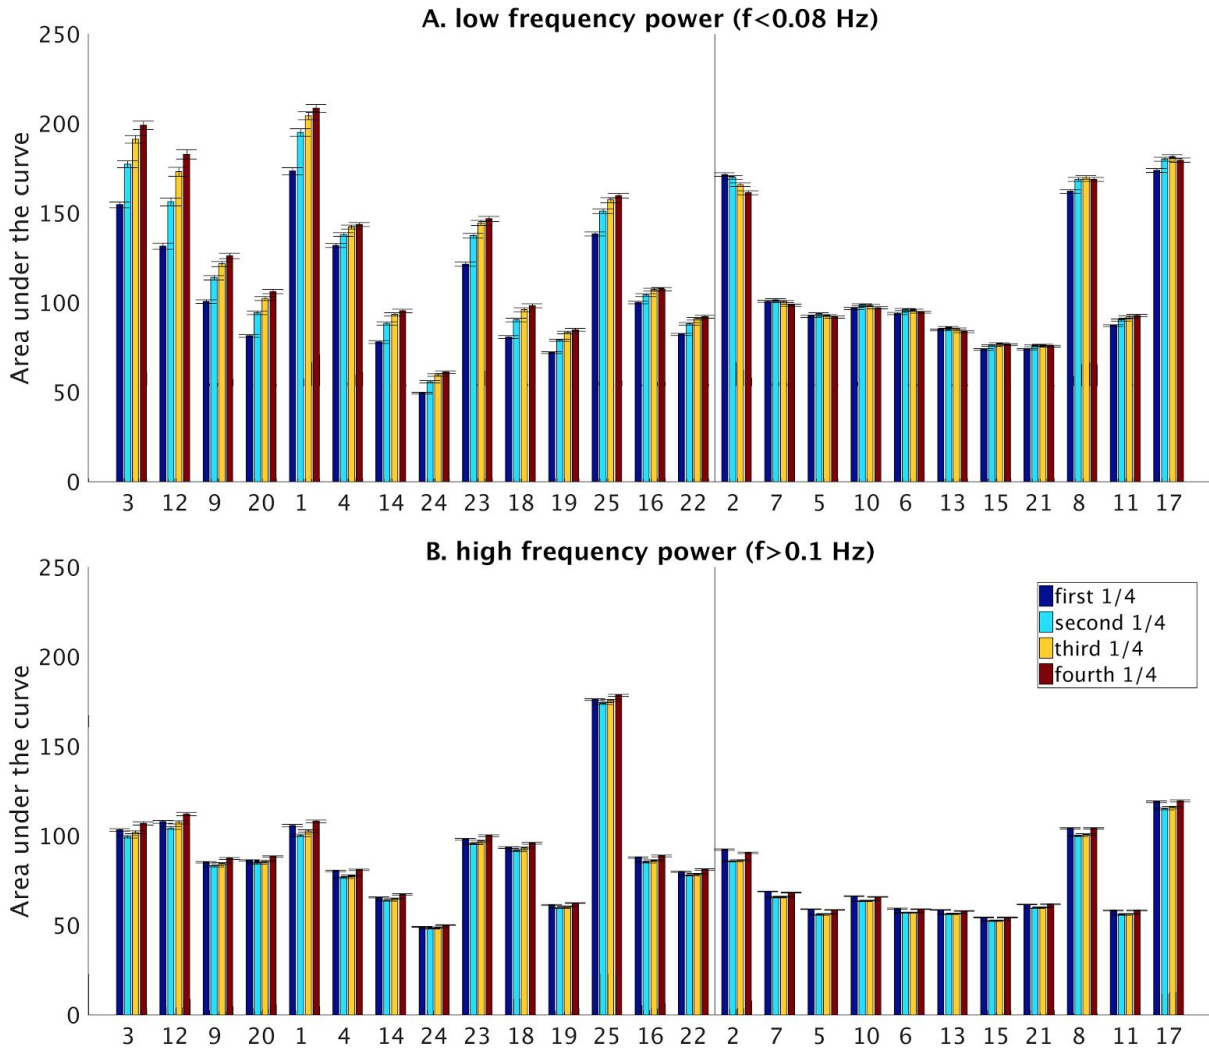

*Figure S5: Within-run changes in low and high frequency power. Fourier transforms were calculated for each 4-minute block for each subject, and areas under the curve were estimated for the low frequency range ( $<0.08$  Hz) and for the high frequency range ( $>0.1$  Hz). The barplots show the average area under the curve across subjects and error bars indicate the standard error of the mean. These results show that the increase in amplitude observed across the runs is associated with increased low frequency amplitude, suggesting that it may be neuronal in origin.*



**Figure S6: Within run changes after volume censoring**

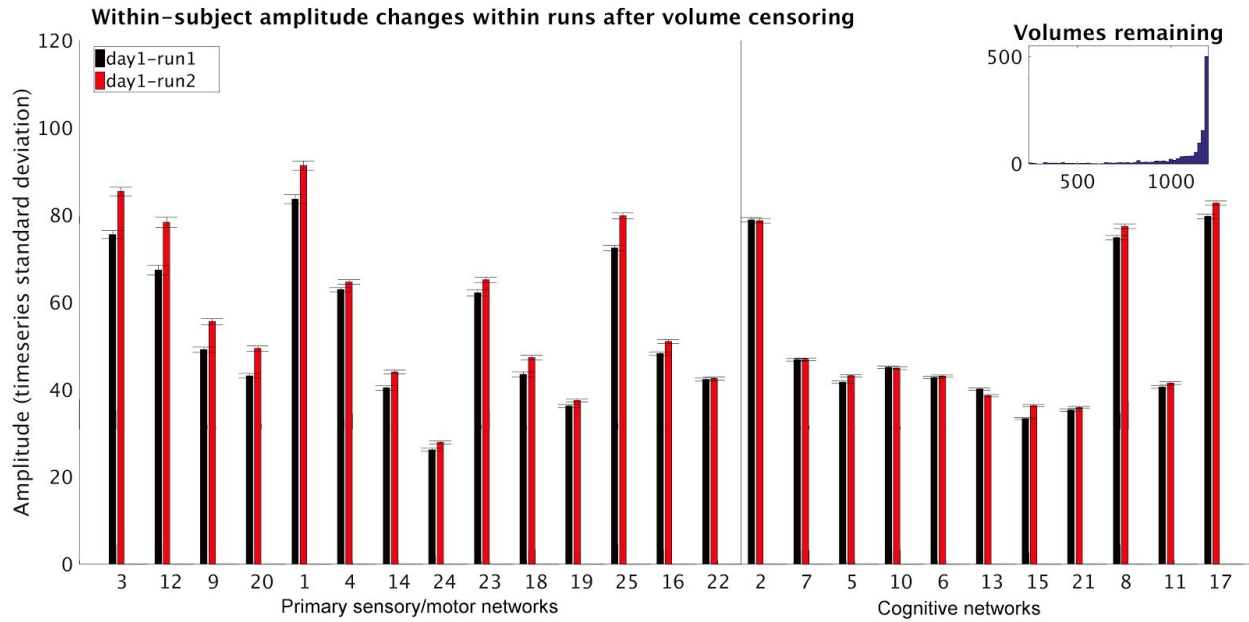

*Figure S6: After volume censoring is performed on data from day 1, the same increase in BOLD amplitude of primary sensory/motor networks in run two compared to run one is seen. The figure insert in the top right corner shows the number of volumes retained after volume censoring (scans with fewer than 240 volumes retained were excluded from this analysis). This confirms that these findings are not driven by motion-induced artefacts.*

**Figure S7: Cross-subject clustering results for UK Biobank (ICA d = 25)**

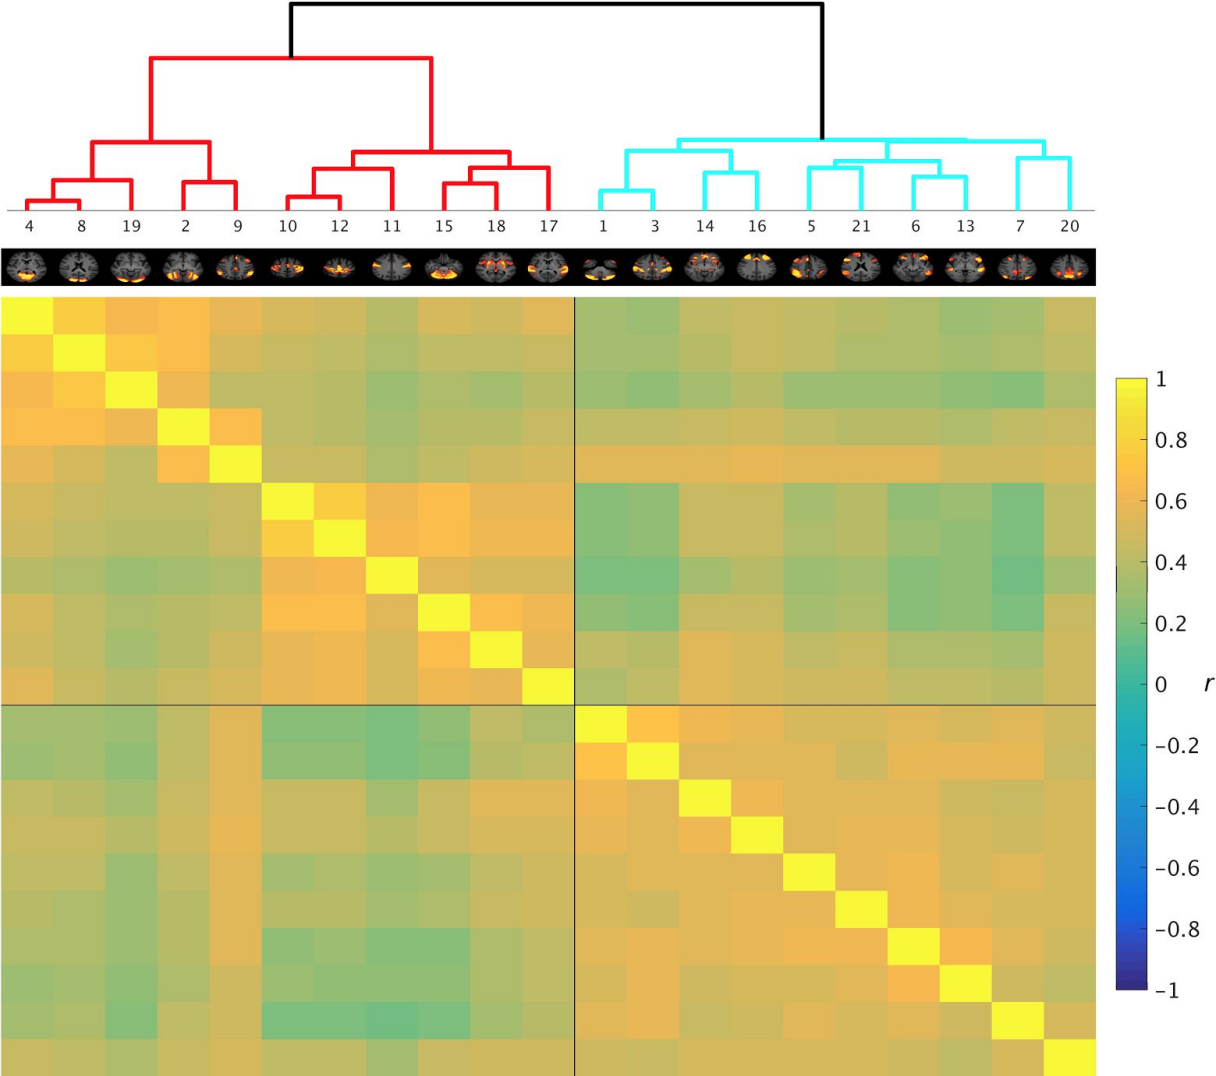

*Figure S7: Cross subject clustering of network amplitude correlation matrix in the UK Biobank data. The cluster tree at the top clearly separates the networks into two distinct clusters, and these clusters are very similar to the clusters shown in figure 1 with primary sensory/motor networks in the red cluster on the left and cognitive networks in the blue cluster on the right.*



**Figure S8: Changes in functional connectivity between run 1 on day 1 and run 1 on day 2**

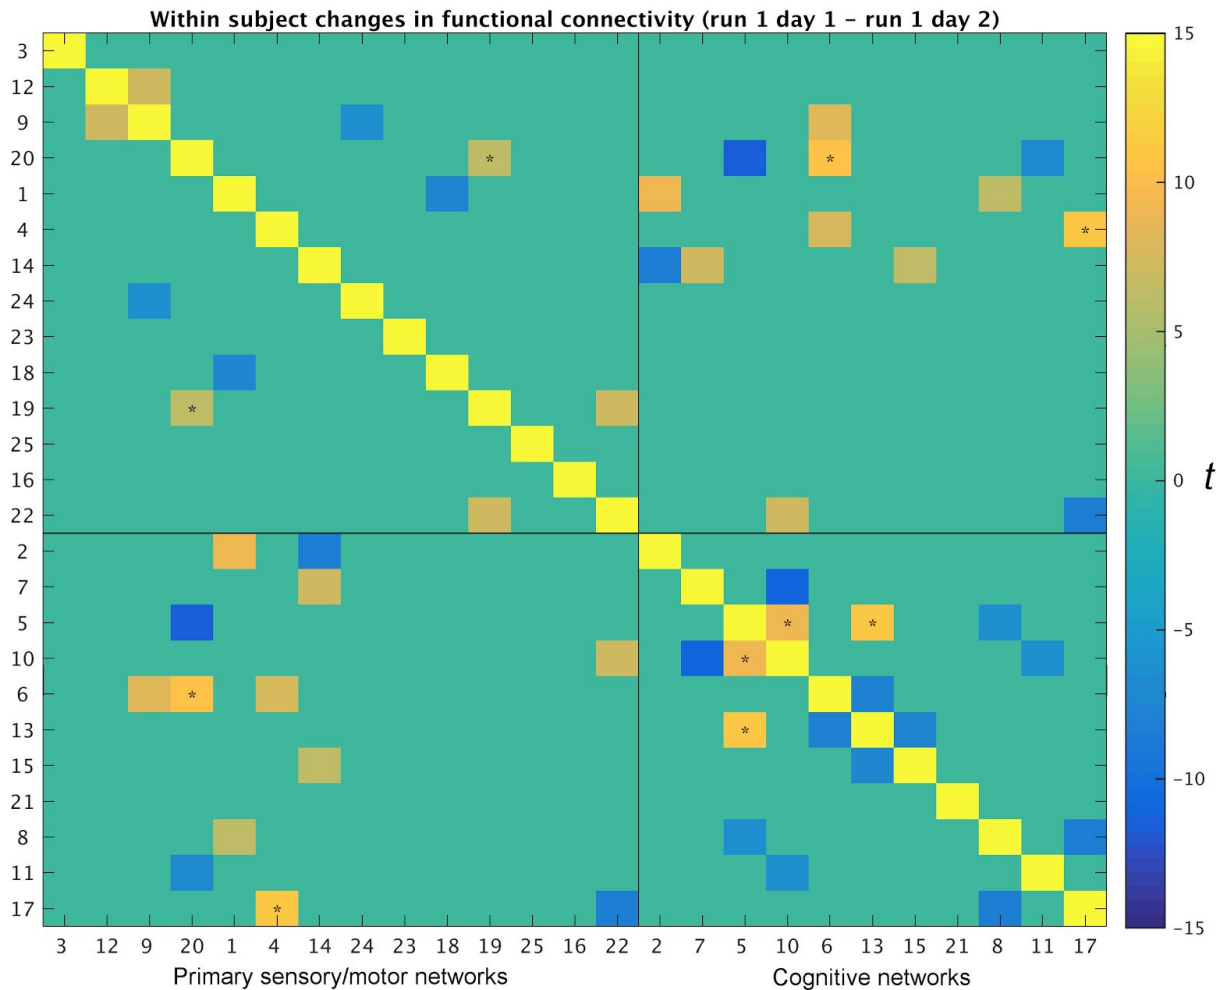

*Figure S8: Changes in functional connectivity occurring as a result of amplitude changes. The colour scale reflects  $t$  statistics for the paired  $t$ -test between run 1 on day 1 and run 1 on day 2 (only edges that pass Bonferroni correction and have a  $|t| > 6$  are shown). These changes in functional connectivity could only partially be explained by changes in network amplitude. Cases where additive signal common to both networks explained the change in functional connectivity are marked \*.*
